# Supplementary material for: Irgacure 2959-functionalized poly(ethyleneimine)s as improved photoinitiators: enhanced water solubility, migration stability and visible-light operation
Source: Royal Society of Chemistry journal article supplement (doi:10.1039/d1py00298h), 2021-01-01
Supplement: d1py00298h1.pdf [file d1py00298h1.pdf]

## Supporting Information

### **Irgacure 2959-functionalized poly(ethyleneimine)s as improved photoinitiators: Enhanced water solubility, migration stability and visible-light operation**

*Tugce Nur Eren,<sup>a</sup> Neslihan Kariksiz,<sup>a</sup> Gozde Demirci,<sup>b</sup> Duygu Tuncel,<sup>a</sup>*

*Neren Okte,<sup>a</sup> Havva Yagci Acar,<sup>c, d</sup> Duygu Avci\*<sup>a</sup>*

<sup>a</sup> Department of Chemistry, Bogazici University, 34342 Bebek, Istanbul, Turkey

<sup>b</sup> Graduate School of Materials Science & Engineering, Koc University, Rumelifeneri Yolu,  
34450 Sariyer, Istanbul, Turkey

<sup>c</sup> Department of Chemistry, Koc University, 34450 Sariyer, Istanbul, Turkey

<sup>d</sup> Surface Science & Technology Center (KUYTAM), Koc University, 34450 Sariyer,  
Istanbul, Turkey

\*Author for correspondence: Department of Chemistry, Bogazici University, 34342 Bebek,  
Istanbul, Turkey. Email: [avcid@boun.edu.tr](mailto:avcid@boun.edu.tr)

**Measurements and Characterizations.**  $^{13}\text{C}$ - NMR spectrum was recorded in deuterated water ( $\text{D}_2\text{O}$ ) at ambient temperature on a Varian Gemini (400 MHz) spectrometer. Differential scanning calorimetric (DSC) measurements were performed on a TA Instruments Q250 with a heating rate of  $10\text{ }^\circ\text{C}/\text{min}$ .

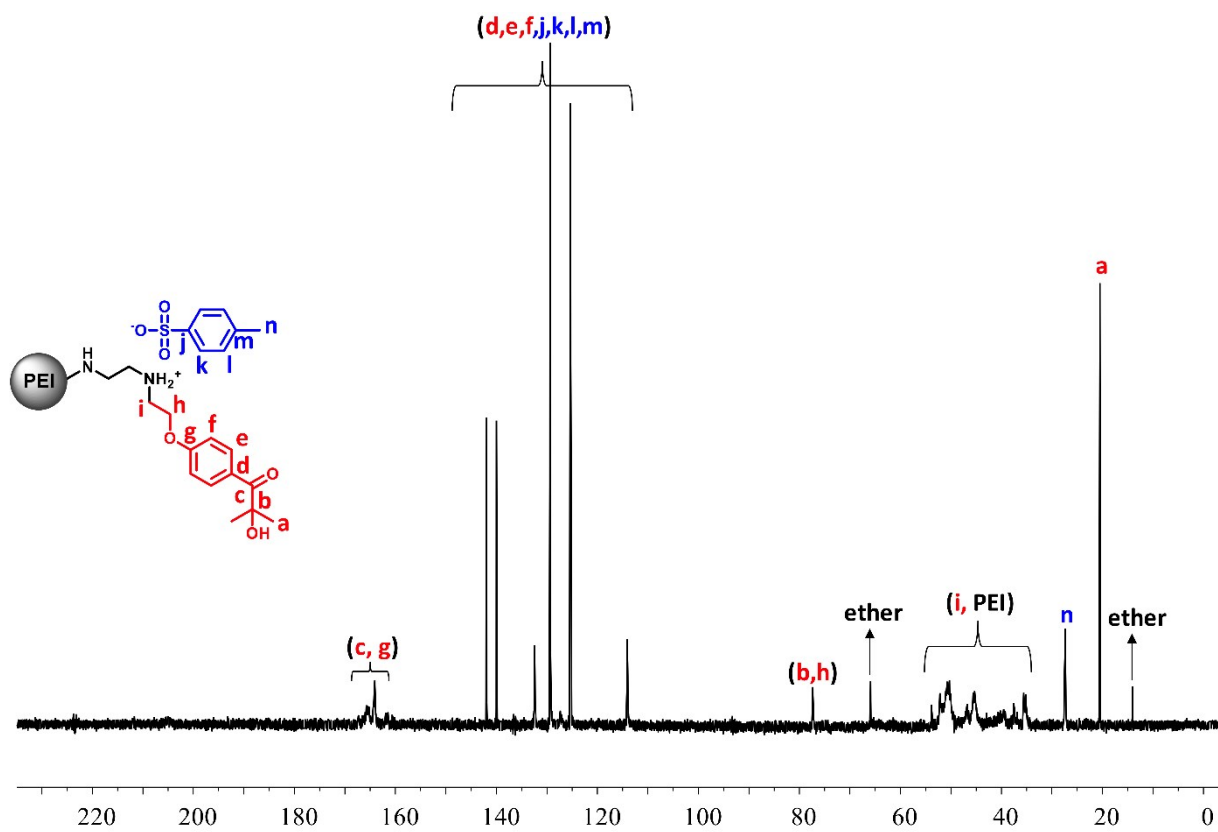

**Figure S1.**  $^{13}\text{C}$ -NMR spectrum of PEI-I2959-Ts.

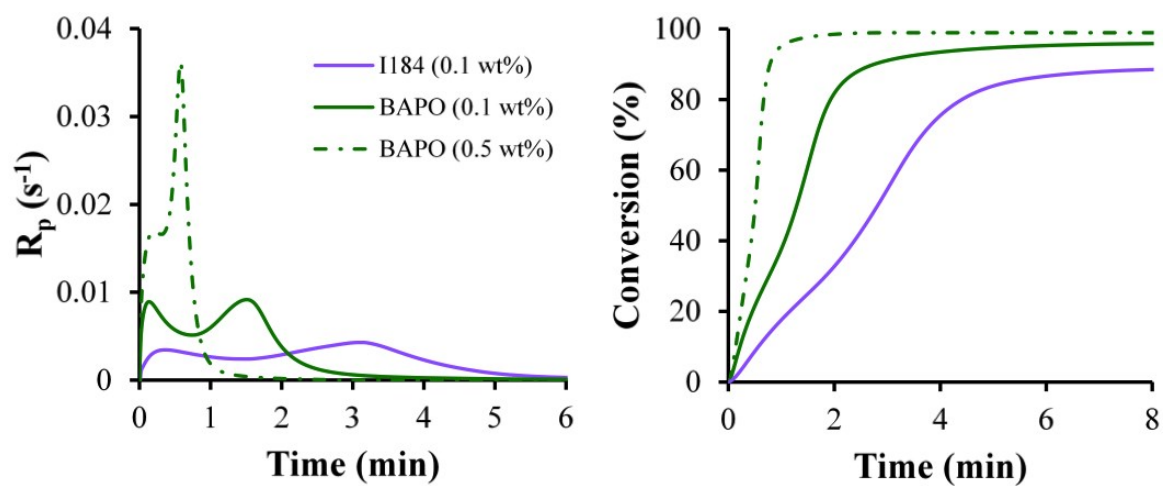

**Figure S2.**  $R_p$  vs time and Conversion (%) vs time plots of BAPO (0.1 wt%) and BAPO (0.5 wt%) under visible light irradiation, I184 (0.1 wt%) under UV light irradiation.
